# Supplementary material
Source: Springer Nature journal article supplement (https://www.springermedizin.de/resource/supplementary/13012_2011_397_MOESM8_ESM.pdf/9629910)

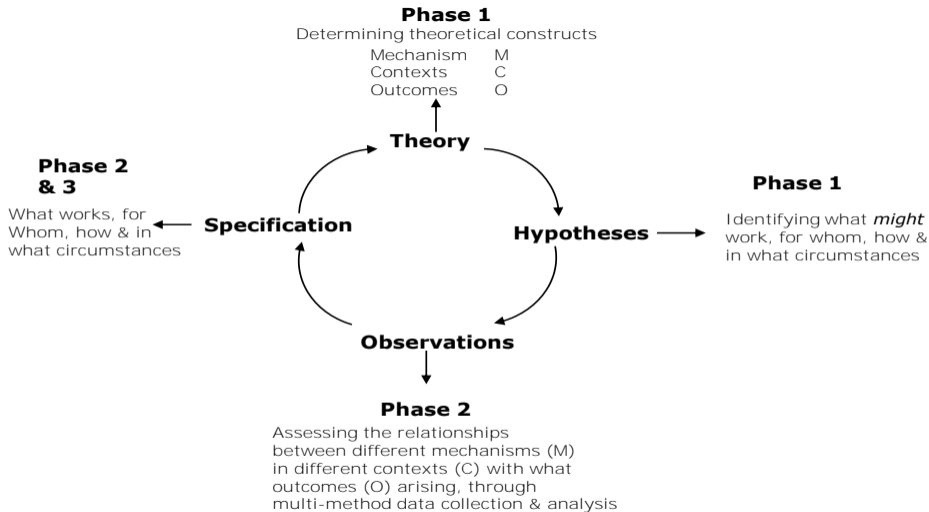

Figure 2: Realistic evaluation cycle as applied to this study

Supplement: MOESM8 [file 9629910]
